# Supplementary material
Source: MDPI journal article supplement (https://www.mdpi.com/1999-4907/11/9/942)
Supplement: s1 [file s1]

# Supplementary materials for

## Divergent Hydraulic Strategies Explain the Interspecific Associations of Co-Occurring Trees in Forest–Steppe Ecotone

Jingyu Dai <sup>1</sup>, Hongyan Liu <sup>1,\*</sup>, Chongyang Xu <sup>1</sup>, Yang Qi <sup>1</sup>, Xinrong Zhu <sup>1</sup>, Mei Zhou <sup>2</sup>, Bingbing Liu <sup>2,3</sup> and Yiheng Wu <sup>2</sup>

<sup>1</sup> College of Urban and Environmental Science and MOE Laboratory for Earth Surface Processes, Peking University, Beijing 100871, China; daijingyu@pku.edu.cn (J.D.); xchongyang1008@126.com (C.X.); qi\_yang@pku.edu.cn (Y.Q.); zhuxinrong@pku.edu.cn (X.Z.)

<sup>2</sup> College of Forestry, Inner Mongolia Agricultural University, Inner Mongolia 010000, China; dxal528@aliyun.com (M.Z.); bingbing-l@caf.ac.cn (B.L.); uykhan@163.com (Y.W.)

<sup>3</sup> Institute of Forest Ecology, Environment and Protection, Chinese Academy of Forestry, Beijing 100091, China; bingbing-l@caf.ac.cn (B.L.)

\* Correspondence: lhy@urban.pku.edu.cn

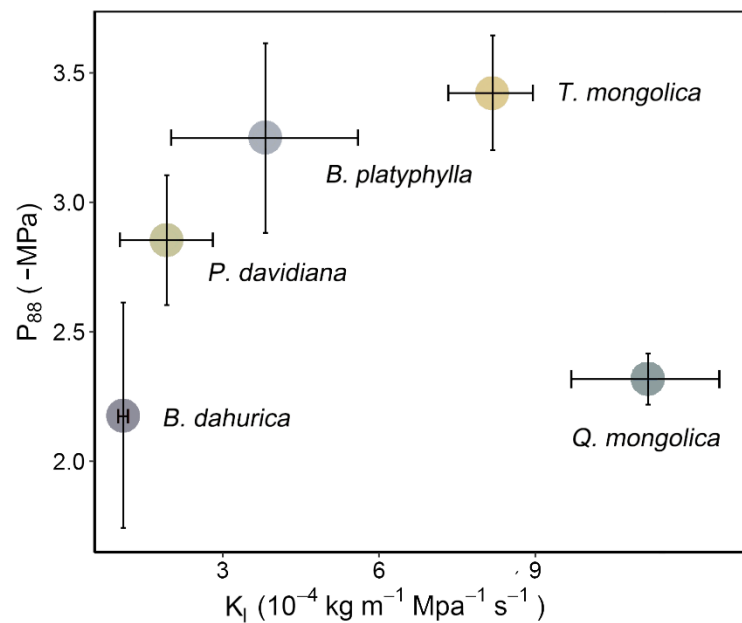

**Figure S1.** The relationship between stem hydraulic transportation efficiency (as measured by leaf specific hydraulic conductivity,  $K_l$ ) and safety (as measured by the water potential of stems at 88% loss of stem conductivity,  $P_{88}$ ) of all species. The error bars show  $\pm 1$  SE.

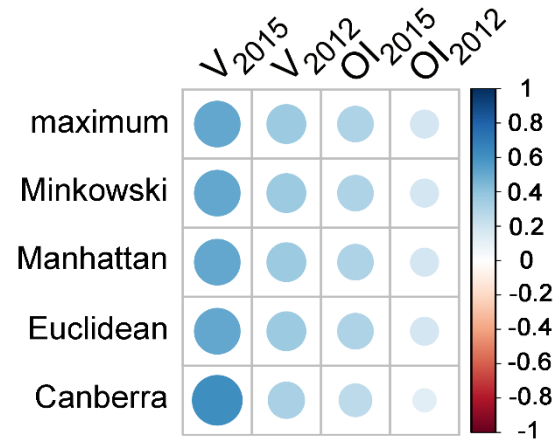

**Figure S2** Spearman correlation between the interspecific association pattern and the hydraulic tradeoff differences among species. The interspecific associations are represented by V value in *Yates* correlation coefficient and *Ochiai* index. The hydraulic tradeoff differences are calculated as Euclidean, Manhattan, Canberra, Minkowski and maximum distances between each species pairs. The size and color of the circles show the correlation coefficients.
